# Supplementary material for: A gene co-expression network-based analysis of multiple brain tissues reveals novel genes and molecular pathways underlying major depression
Source: PubMed Central journal article supplement (PMC6658115; doi:10.1371/journal.pgen.1008245), 2019-07-15

**A**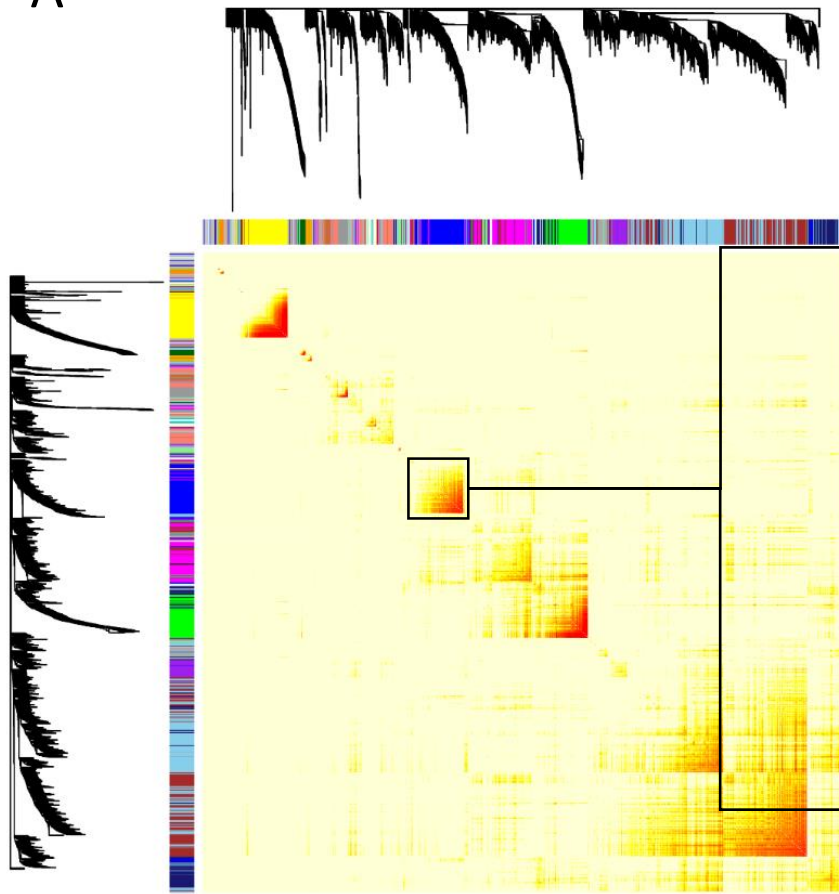**B**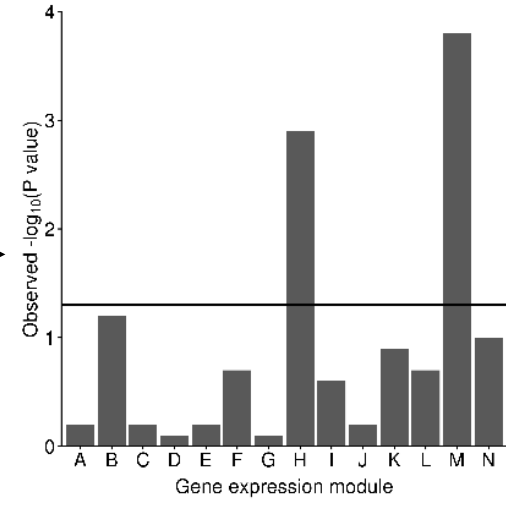**C**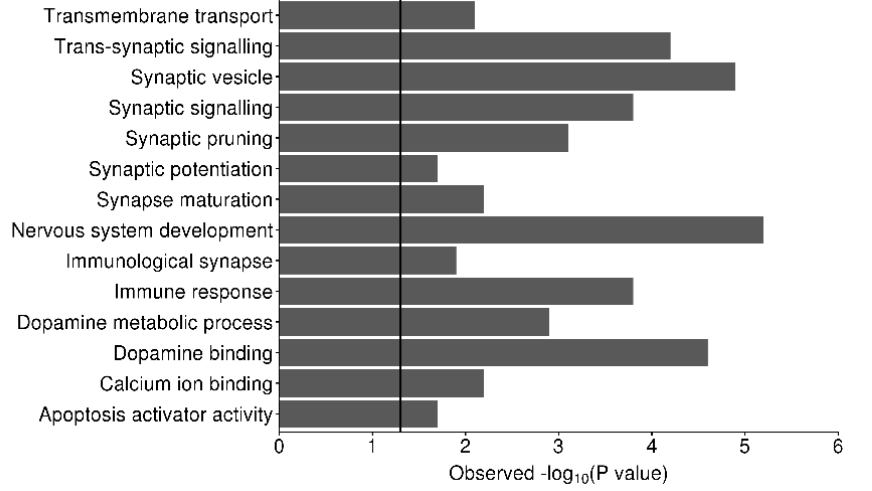**D**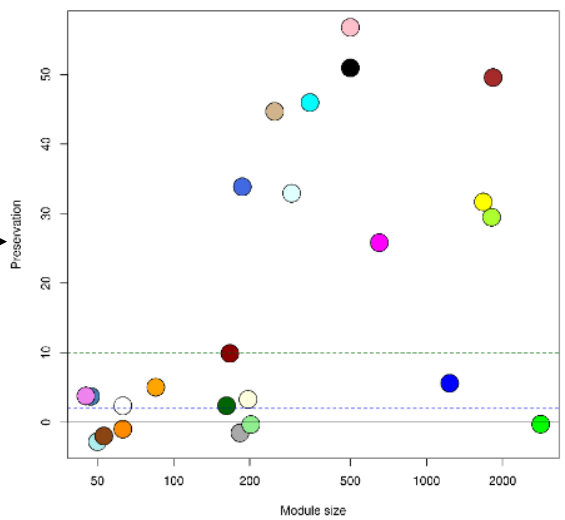

Supplement: pgen.1008245.s013.pdf [file pgen.1008245.s013.pdf]
